# Supplementary material for: Molecular and clinical analyses of PHF6 mutant myeloid neoplasia provide their pathogenesis and therapeutic targeting
Source: PubMed Central journal article supplement (PMC10901781; doi:10.1038/s41467-024-46134-w), 2024-02-28
Supplement: 41467_2024_46134_MOESM1_ESM.pdf [file 41467_2024_46134_MOESM1_ESM.pdf]

# Supplementary Information

## **Molecular and clinical analyses of PHF6 mutant myeloid neoplasia provide their pathogenesis and therapeutic targeting**

Yasuo Kubota<sup>1</sup>, Xiaorong Gu<sup>1</sup>, Laila Terkawi<sup>1</sup>, Juraj Bodo<sup>2</sup>, Bartłomiej P. Przychodzen<sup>1</sup>, Hussein Awada<sup>1</sup>, Nakisha Williams<sup>1</sup>, Carmelo Gurnari<sup>1,3</sup>, Naomi Kawashima<sup>1</sup>, Mai Aly<sup>1</sup>, Arda Durmaz<sup>1</sup>, Minako Mori<sup>1</sup>, Ben Ponvilawan<sup>1</sup>, Tariq Kewan<sup>1</sup>, Waled Bahaj<sup>1</sup>, Manja Meggendorfer<sup>4</sup>, Babal K. Jha<sup>1,5</sup>, Valeria Visconte<sup>1</sup>, Heesun J Rogers<sup>2</sup>, Torsten Haferlach<sup>4</sup>, Jaroslaw P. Maciejewski<sup>1</sup>

1. Department of Translational Hematology and Oncology Research, Taussig Cancer Institute, Cleveland Clinic, Cleveland, OH, USA.
2. Department of Laboratory Medicine, Cleveland Clinic, Cleveland Clinic, Cleveland, OH, USA.
3. Department of Biomedicine and Prevention, University of Rome Tor Vergata, Rome, Italy.
4. MLL Munich Leukemia Laboratory, Munich, Germany.
5. Center for Immunotherapy and Precision Immuno-Oncology, Lerner Research Institute (LRI) Cleveland Clinic, Cleveland, OH, USA.

### Inventory of Supplementary Information

Supplementary Figure 1: Lollipop plot illustrating PHF6 mutational data in this study group.

Supplementary Figure 2: The frequencies of PHF6 mutations in MNs and their subtypes.

Supplementary Figure 3: PHF6 status in femal AML cases.

Supplementary Figure 4: Comparisons of frequencies of mutations in nonescpaing genes based on X chromosomal status.

Supplementary Figure 5: Comparisons of frequencies of mutations with or without RUNX1 mutations based on each MN disease.

Supplementary Figure 6: Significant genetics correlations by each sex.

Supplementary Figure 7: Survival analysis for AML cases with or without PHF6 mutations by each cohort.

Supplementary Figure 8: Event free survival for AML cases with or withous PHF6 mutations in the CCF and MLL cohort.

Supplementary Figure 9: Survival analysis for AML cases by disease risk.

Supplementary Figure 10: Survival analysis for AML cases with double mutations (PHF6 and RUNX1) by each cohort.

Supplementary Figure 11: Event free survival for AML cases with double mutations (PHF6 and RUNX1) in the CCF and MLL cohort.

Supplementary Figure 12: SDS-PAGE for IP-WB.

Supplementary Figure 13: Gene expression analysis in RUNX1-mutated AML cases.

Supplementary Figure 14: The fraction of truncating mutations in PHF6- and/or RUNX1-mutated AML cases.

Supplementary Figure 15: Western blots of PHF6 IP.

Supplementary Figure 16: Western blots of endogenous PHF6 IP.

Supplementary Figure 17: Lollipop plot showing RUNX1 stopgain mutations in male AML cases.

Supplementary Figure 18: Comparisons between PHF6- and/or RUNX1-mutated AML cases.

Supplementary Table 1: Test statistics for mutations in genes on X chromosome.

Supplementary Table 2: Upregulated pathways in PHF6-mutated AML.

Supplementary Table 3: Downregulated pathways in RUNX1-mutated AML.

Supplementary Table 4: FCM results in patients' with PHF6 mutations.

Supplementary Table 5: The number of cases by each cohort.

Supplementary Table 6: Targeted panel genes.

# Supplementary Figure 1

## A

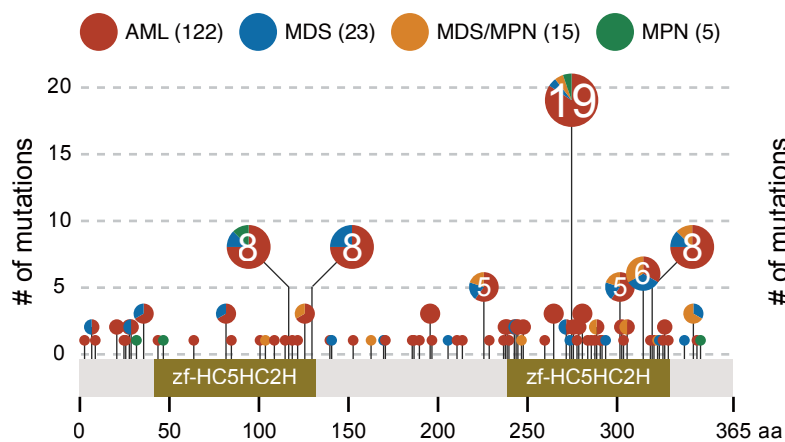

## B

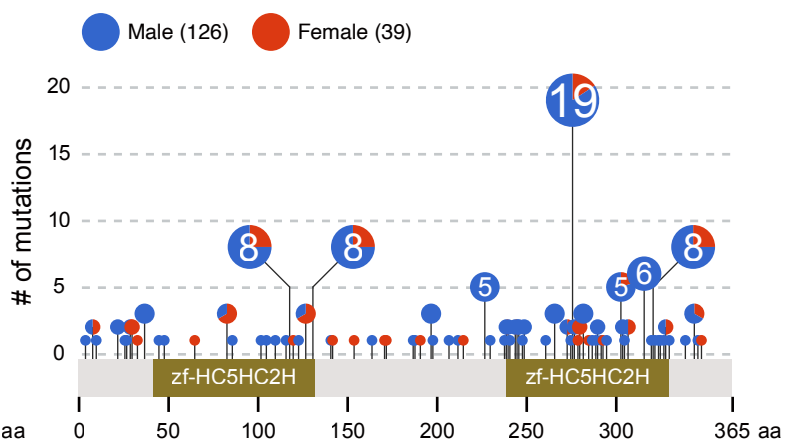

## Supplementary Figure 1

Lollipop plot illustrating *PHF6* mutational data in this study group.

(A) Disease types and (B) sexes are shown by colors as indicated. The numbers in circles indicate the number of cases.

# Supplementary Figure 2

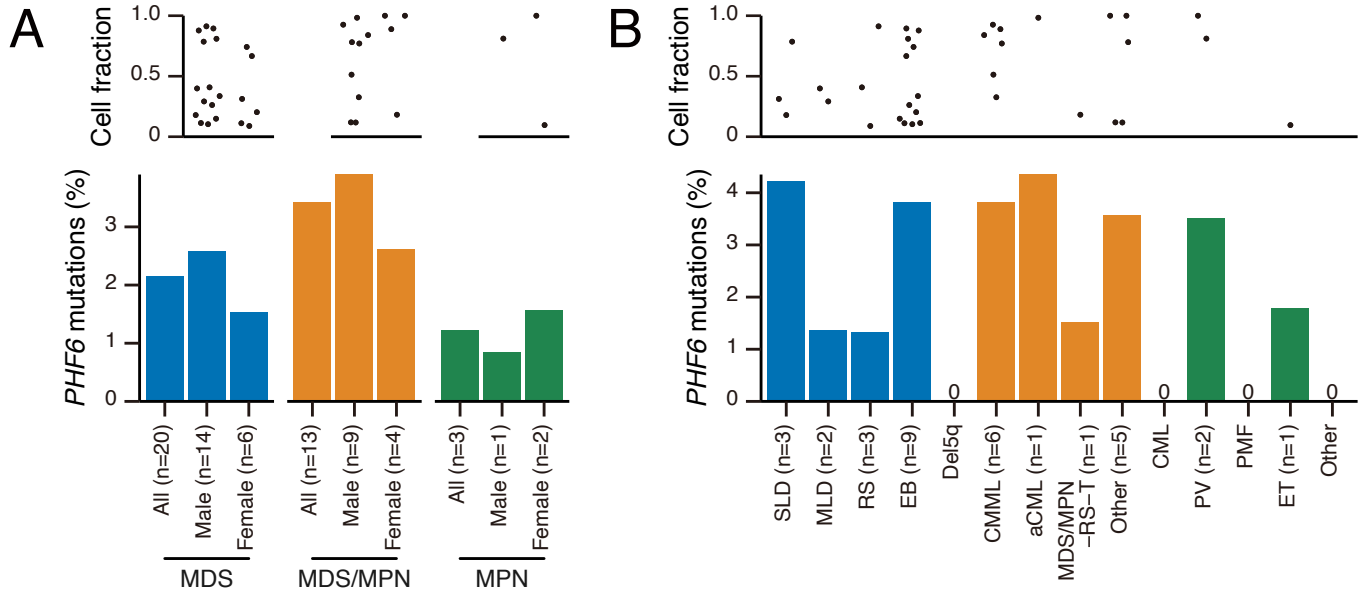

## Supplementary Figure 2

(A) Comparisons of frequencies of *PHF6* mutations based on MN disease in each sex. Each dot in the upper panel represents the cell fraction with *PHF6* mutation.

(B) Comparisons of frequencies of *PHF6* mutations based on each MN subtype. Each dot in the upper panel represents the cell fraction with *PHF6* mutation.

# Supplementary Figure 3

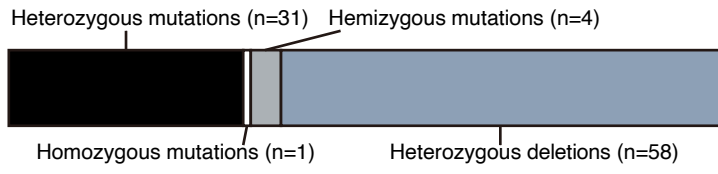

## Supplementary Figure 3

*PHF6* status in female AML cases.

# Supplementary Figure 4

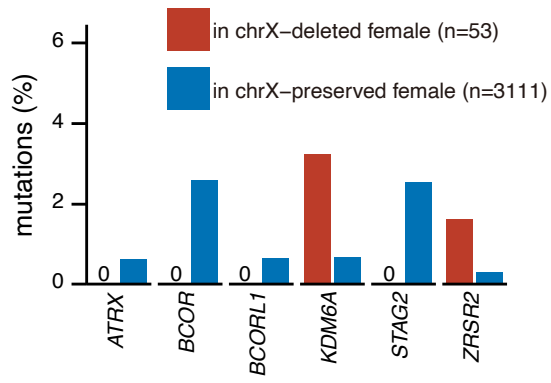

## Supplementary Figure 4

Comparisons of frequencies of mutations in nonescaping genes based on X chromosomal status.

# Supplementary Figure 5

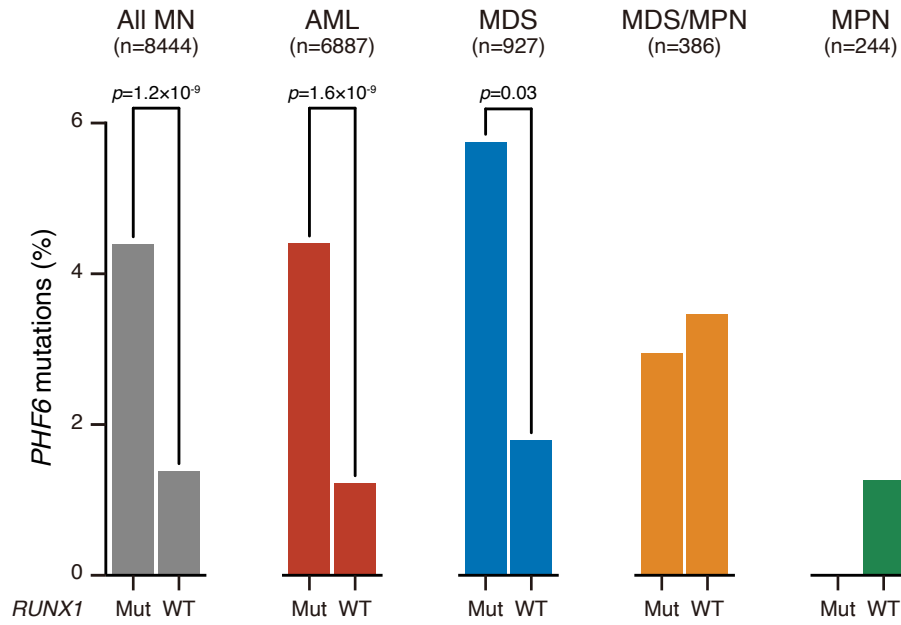

## Supplementary Figure 5

Comparisons of frequencies of *PHF6* mutations with or without *RUNX1* mutations based on each MN disease. *p* values are from the two-sided Fisher's exact test and considered statistically significant at  $p < 0.05$ .

# Supplementary Figure 6

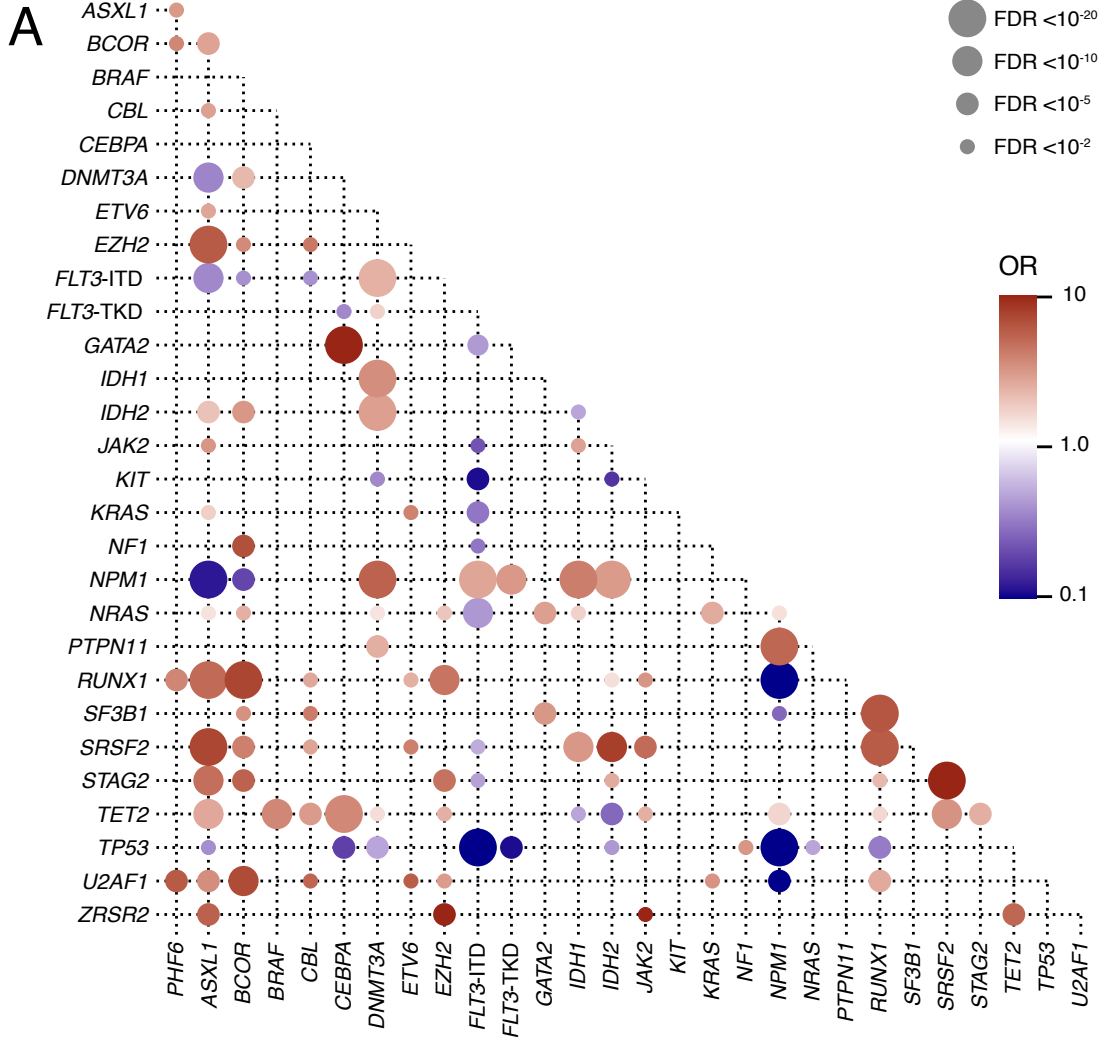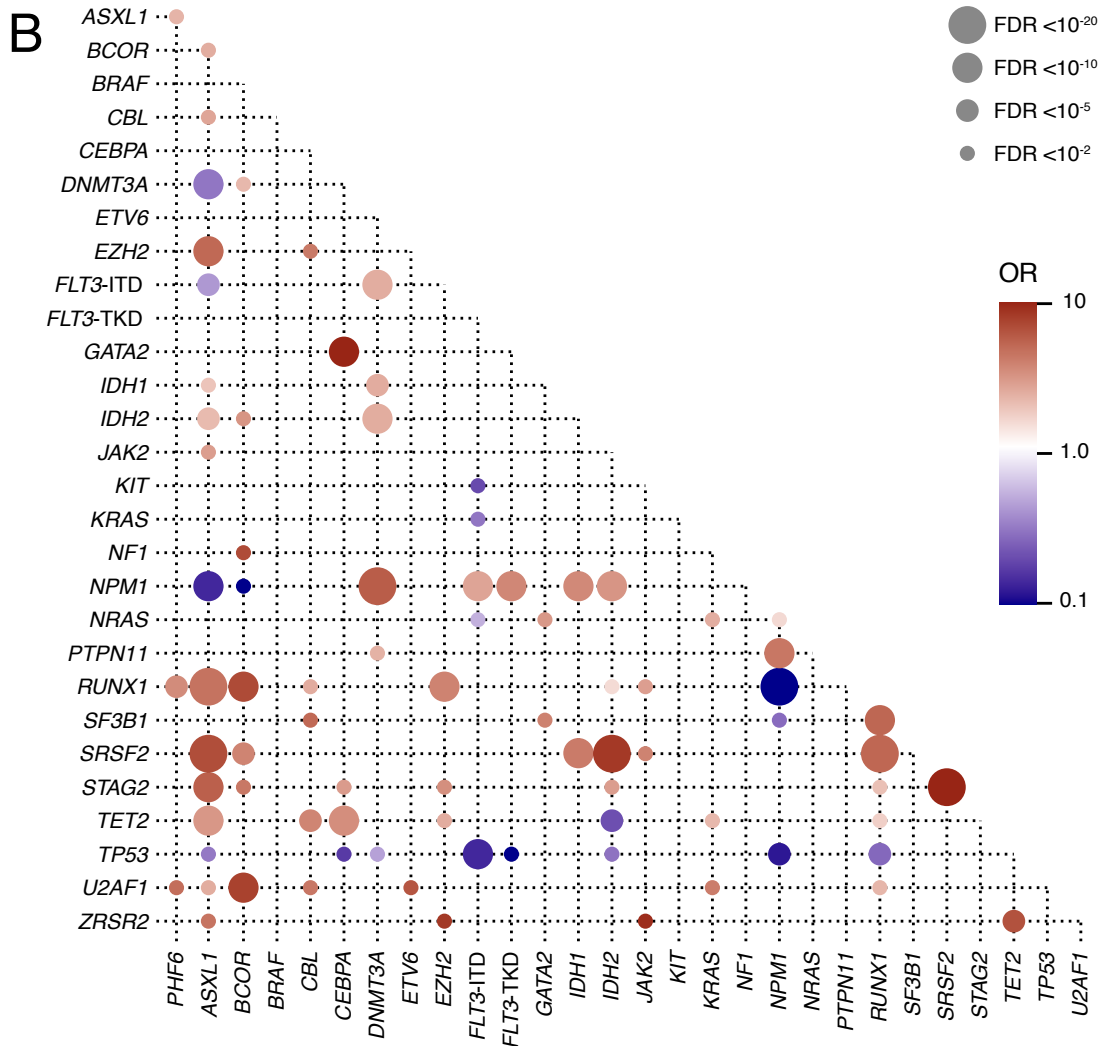

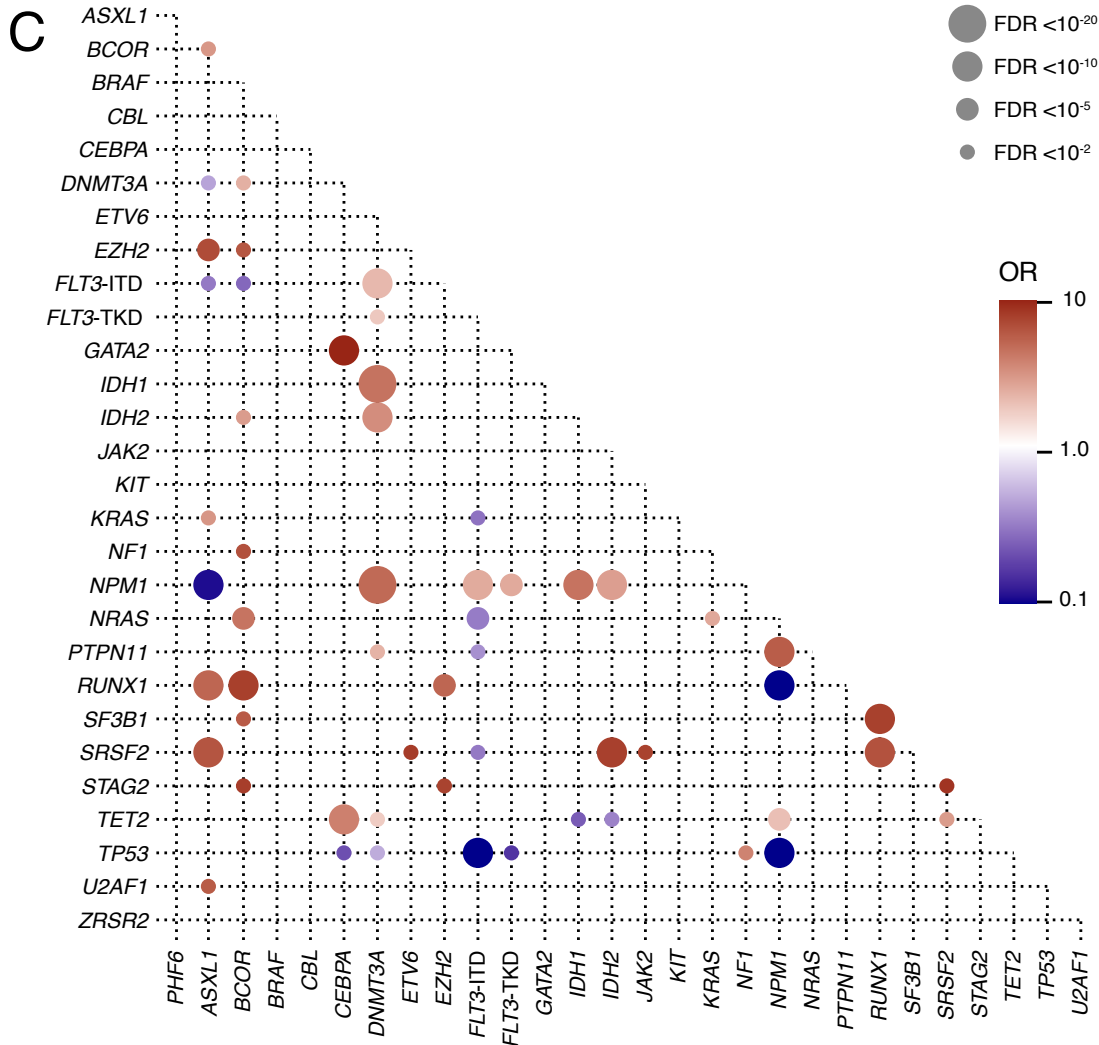

**Supplementary Figure 6**

Supplementary Figure

Bubble plot showcasing statistically significant ( $FDR < 0.05$ ) positive (red) and negative (blue) correlations across gene group in all (A;  $n=6887$ ), male (B;  $n=3715$ ), and female (C;  $n=3172$ ) cases.

Correlations across gene groups were assessed by Fisher's exact test and corrected by employing the Benjamini-Hochberg method.



# Supplementary Figure 7

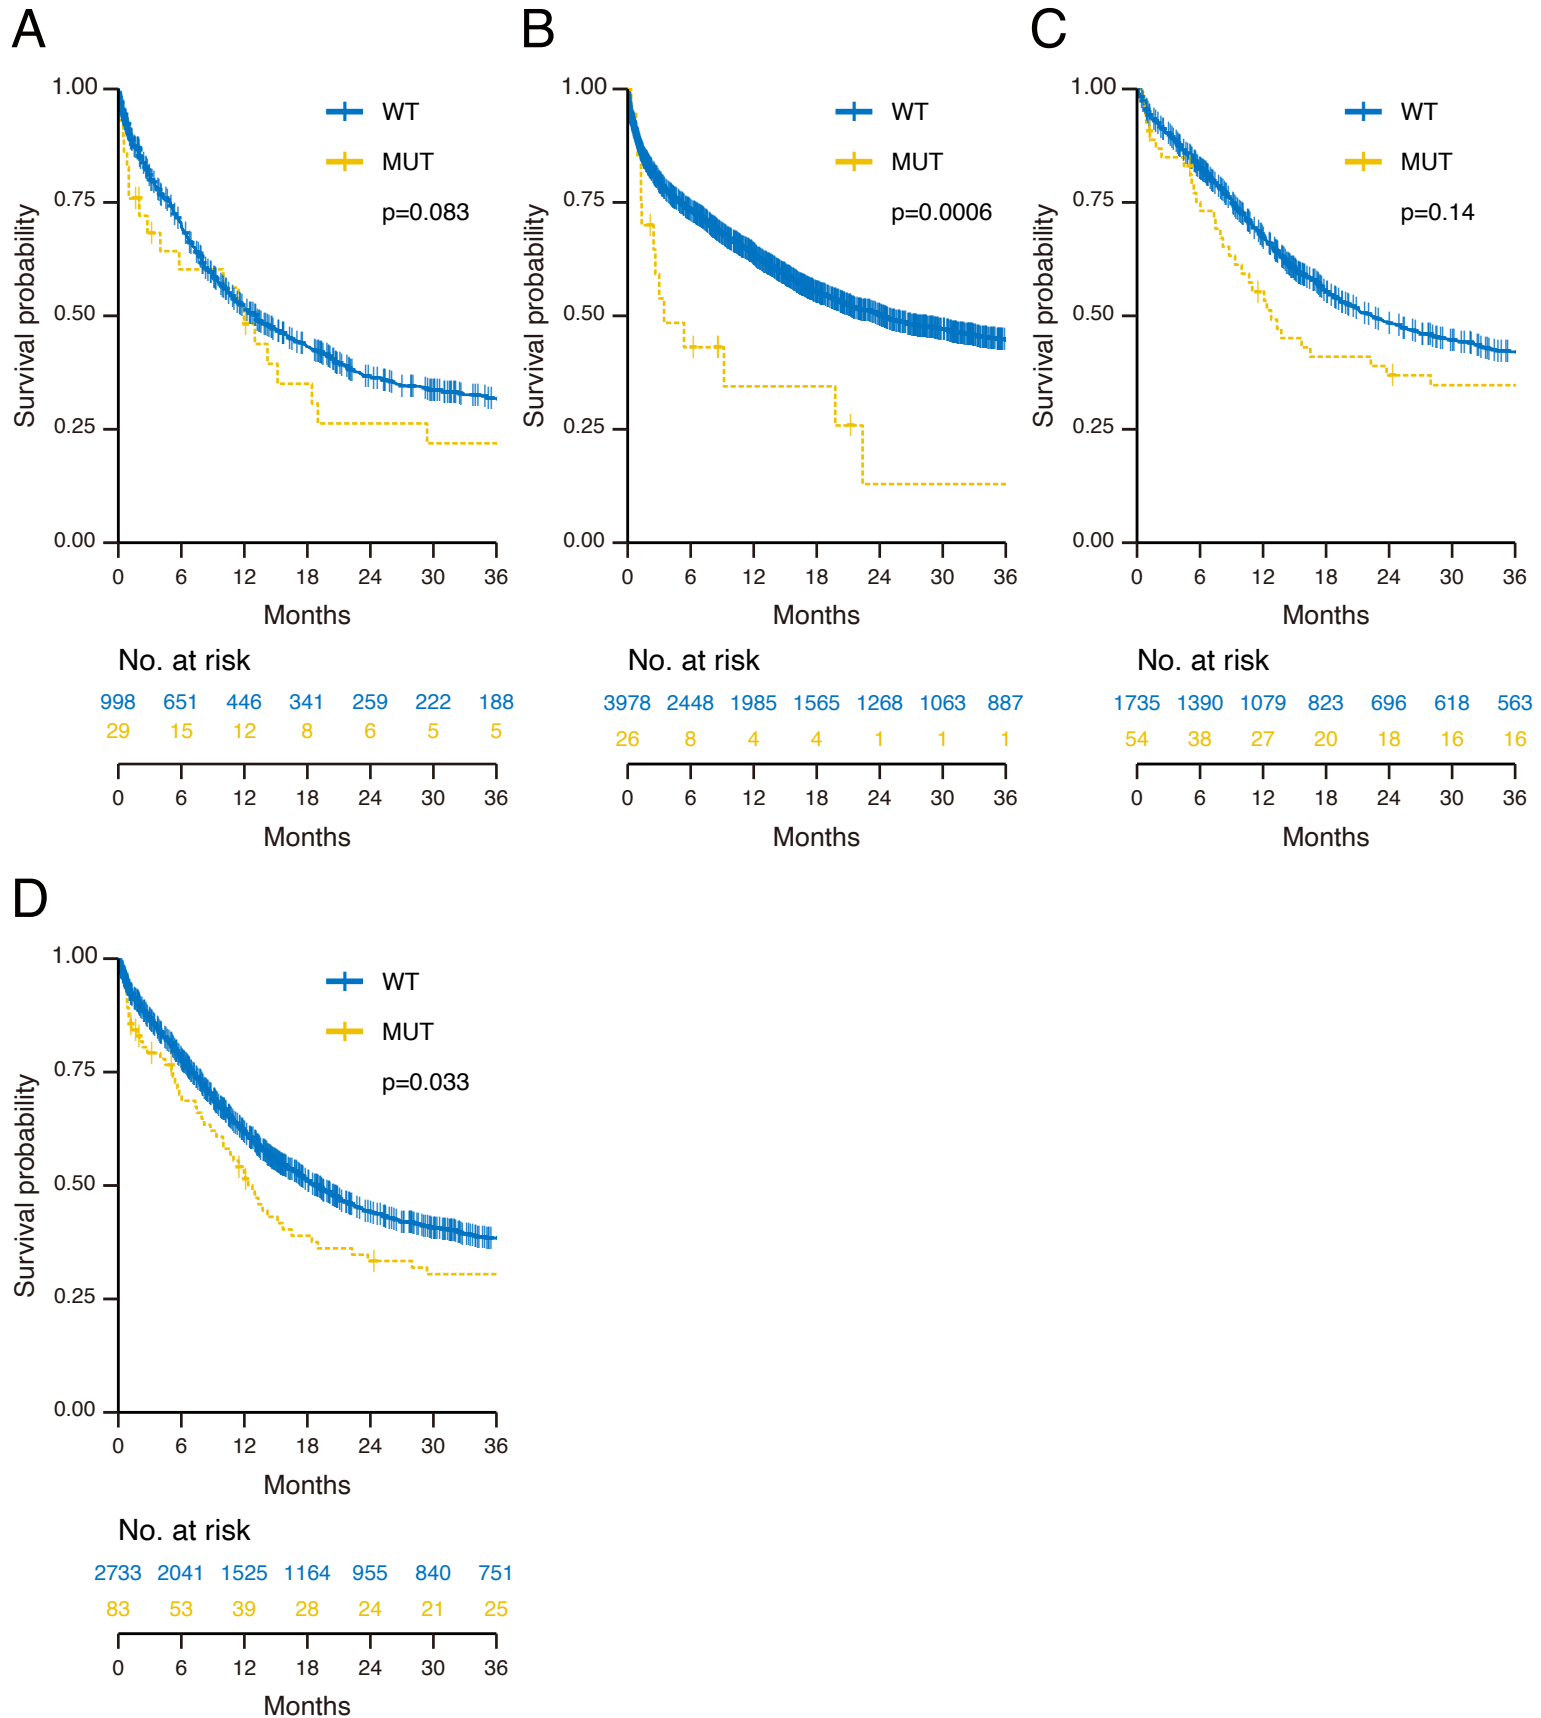

## Supplementary Figure 7

Survival analysis for AML cases with or without *PHF6* mutations by each cohort.

Kaplan-Meier survival curves of overall survival for AML in CCF (A), MLL (B), open data (C), and CCF plus open data (D) cohort. For survival analysis, survival was estimated using the Kaplan-Meier method and the log-rank test was used to assess differences between groups.

# Supplementary Figure 8

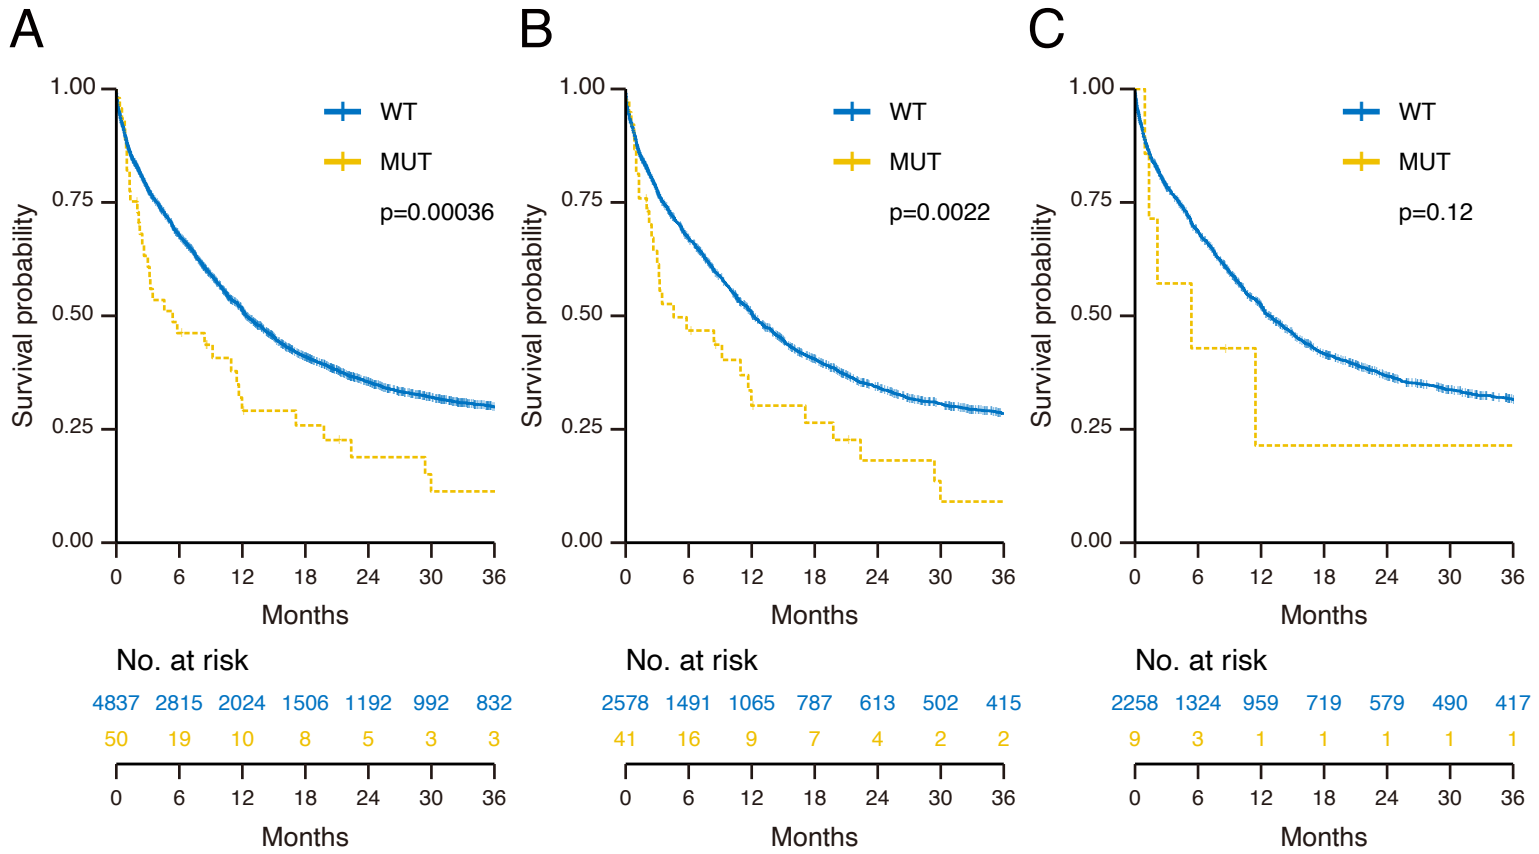

## Supplementary Figure 8

Event free survival for AML cases with or without *PHF6* mutations in the CCF and MLL cohort.

Kaplan-Meier survival curves of event free survival for AML in all (A), male (B), and female (C) cases.

For survival analysis, survival was estimated using the Kaplan-Meier method and the log-rank test was used to assess differences between groups.

# Supplementary Figure 9

**A**

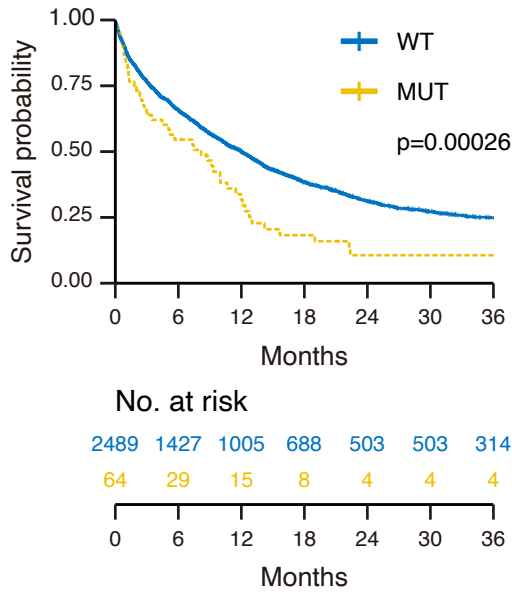

**B**

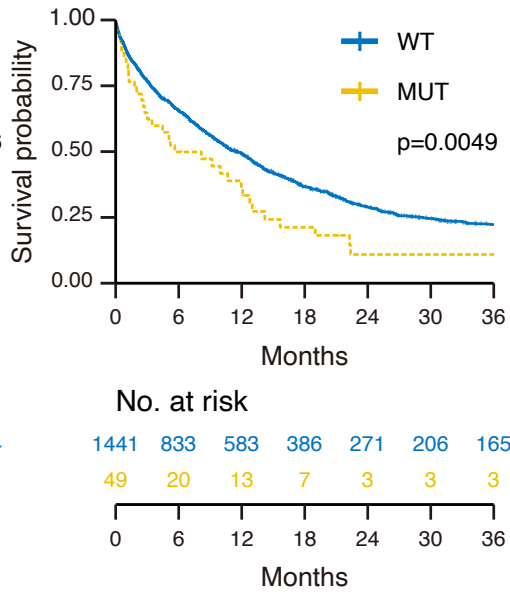

**C**

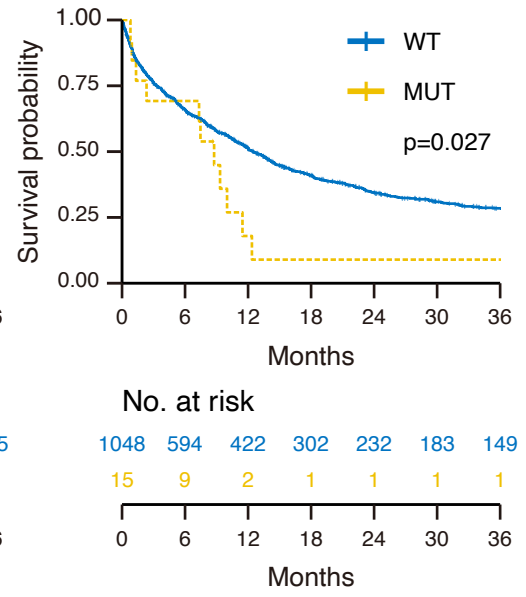

**D**

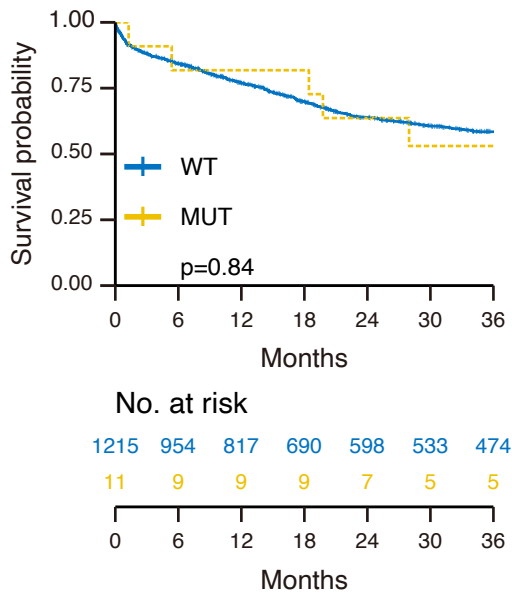

**E**

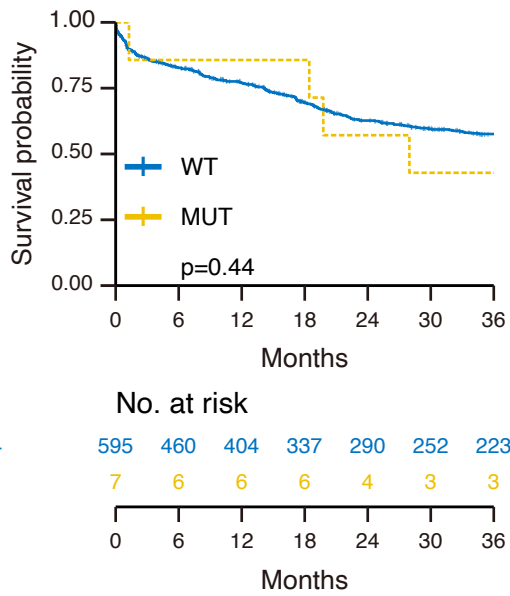

**F**

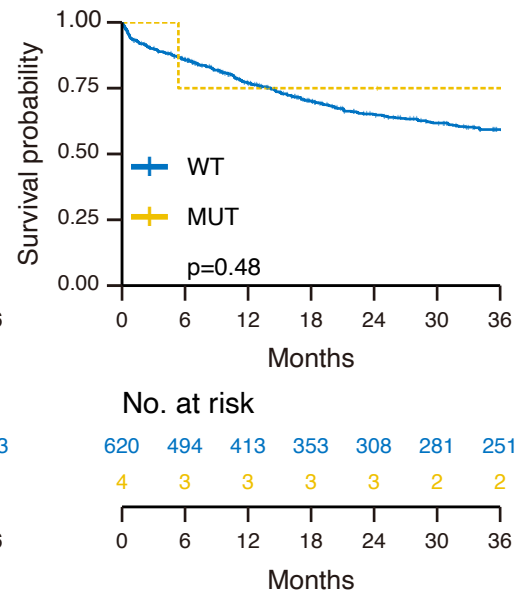

**G**

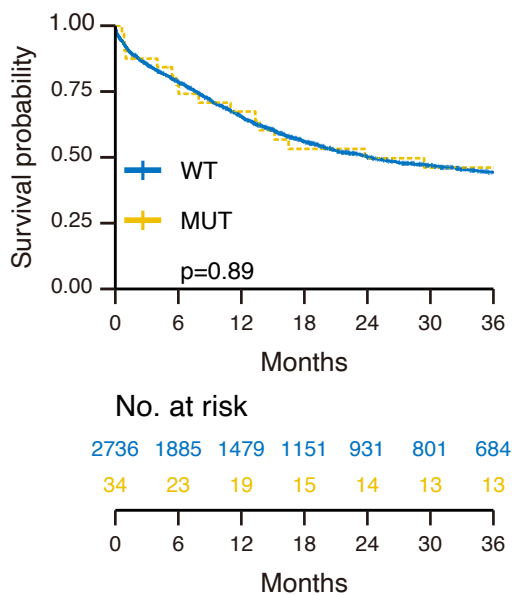

**H**

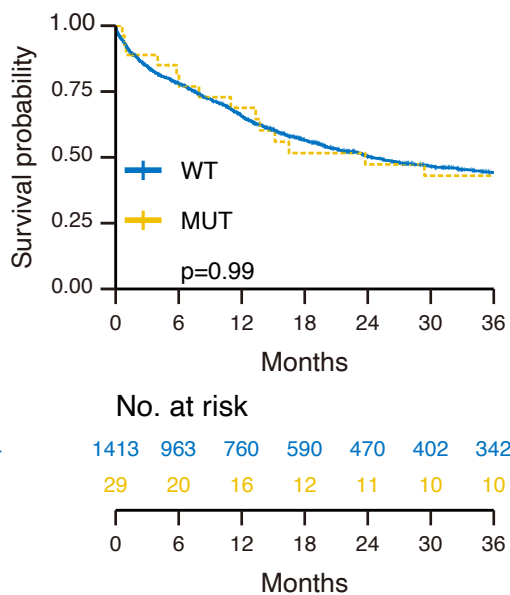

**I**

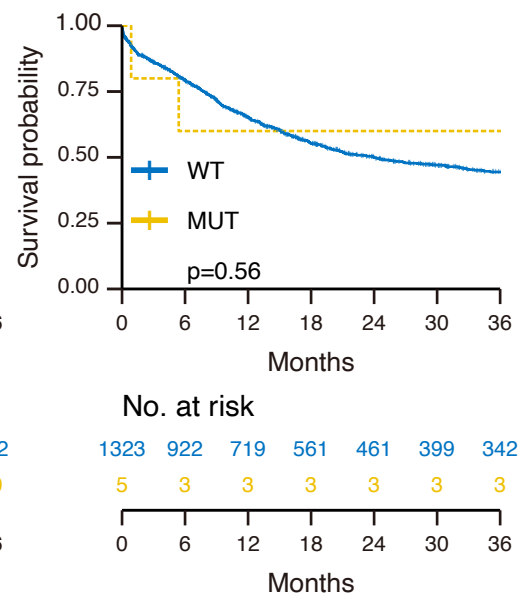

## Supplementary Figure 9

Survival analysis for AML cases by disease risk.

Kaplan-Meier survival curves of overall survival for adverse risk AML in all cases (A), male cases (B), female cases (C), favorable risk in all cases (D), male cases (E), female cases (F), intermediate risk in all cases (G), male cases (H), and female cases (I). For survival analysis, survival was estimated using the Kaplan-Meier method and the log-rank test was used to assess differences between groups.

# Supplementary Figure 10

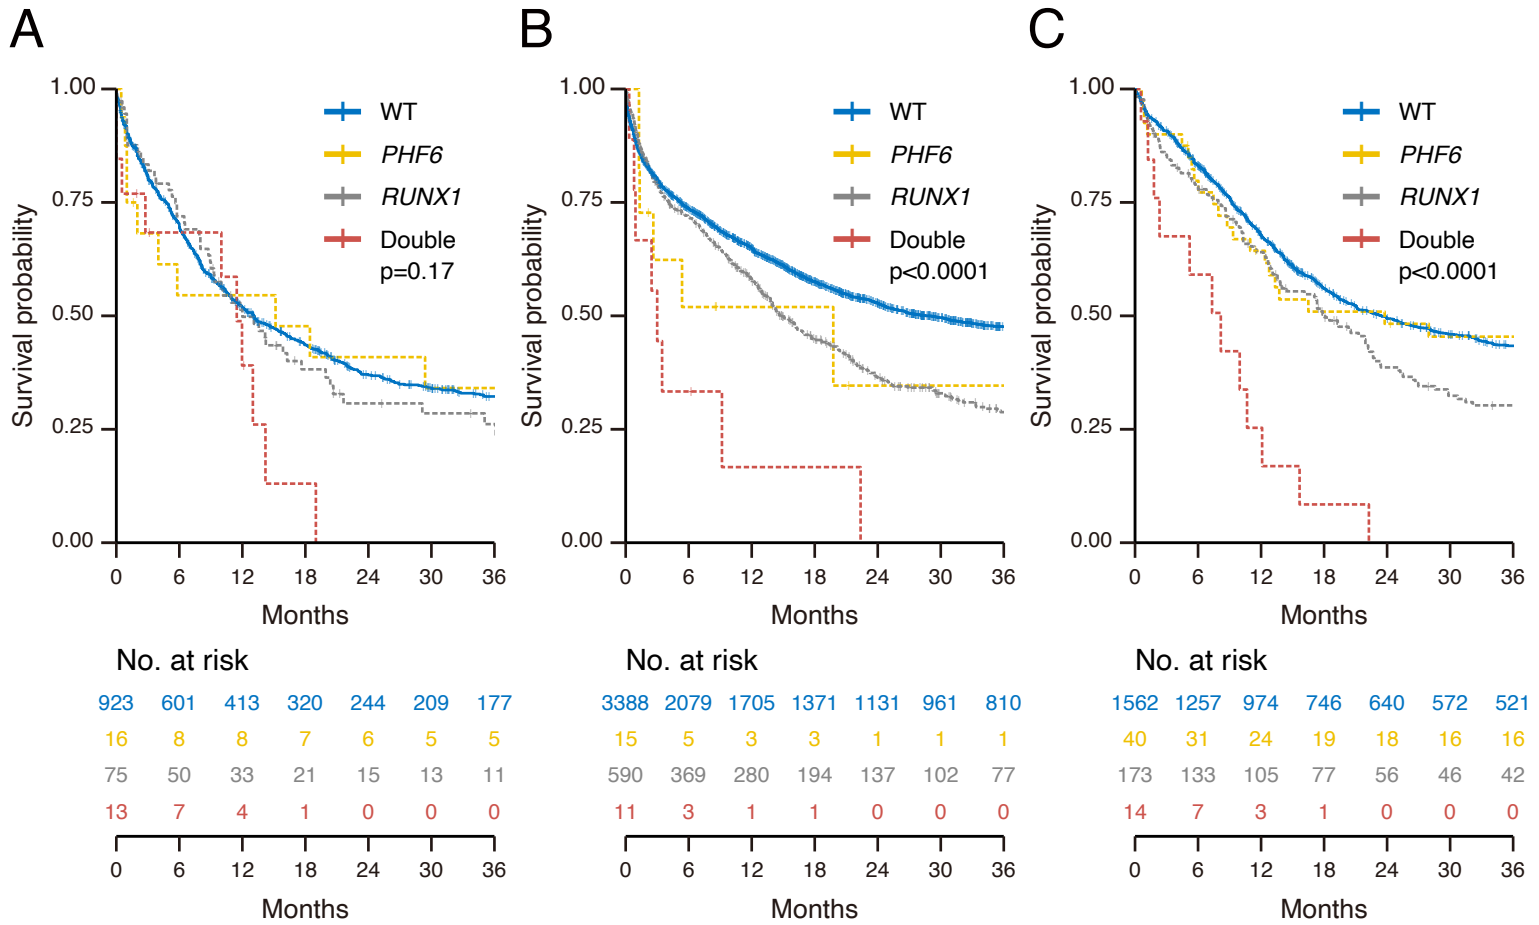

## Supplementary Figure 10

Survival analysis for AML cases with double mutations (*PHF6* and *RUNX1*) by each cohort.

Kaplan-Meier survival curves of overall survival for AML in CCF (A), MLL (B), and open data (C) cohort.

For survival analysis, survival was estimated using the Kaplan-Meier method and the log-rank test was used to assess differences between groups.

# Supplementary Figure 11

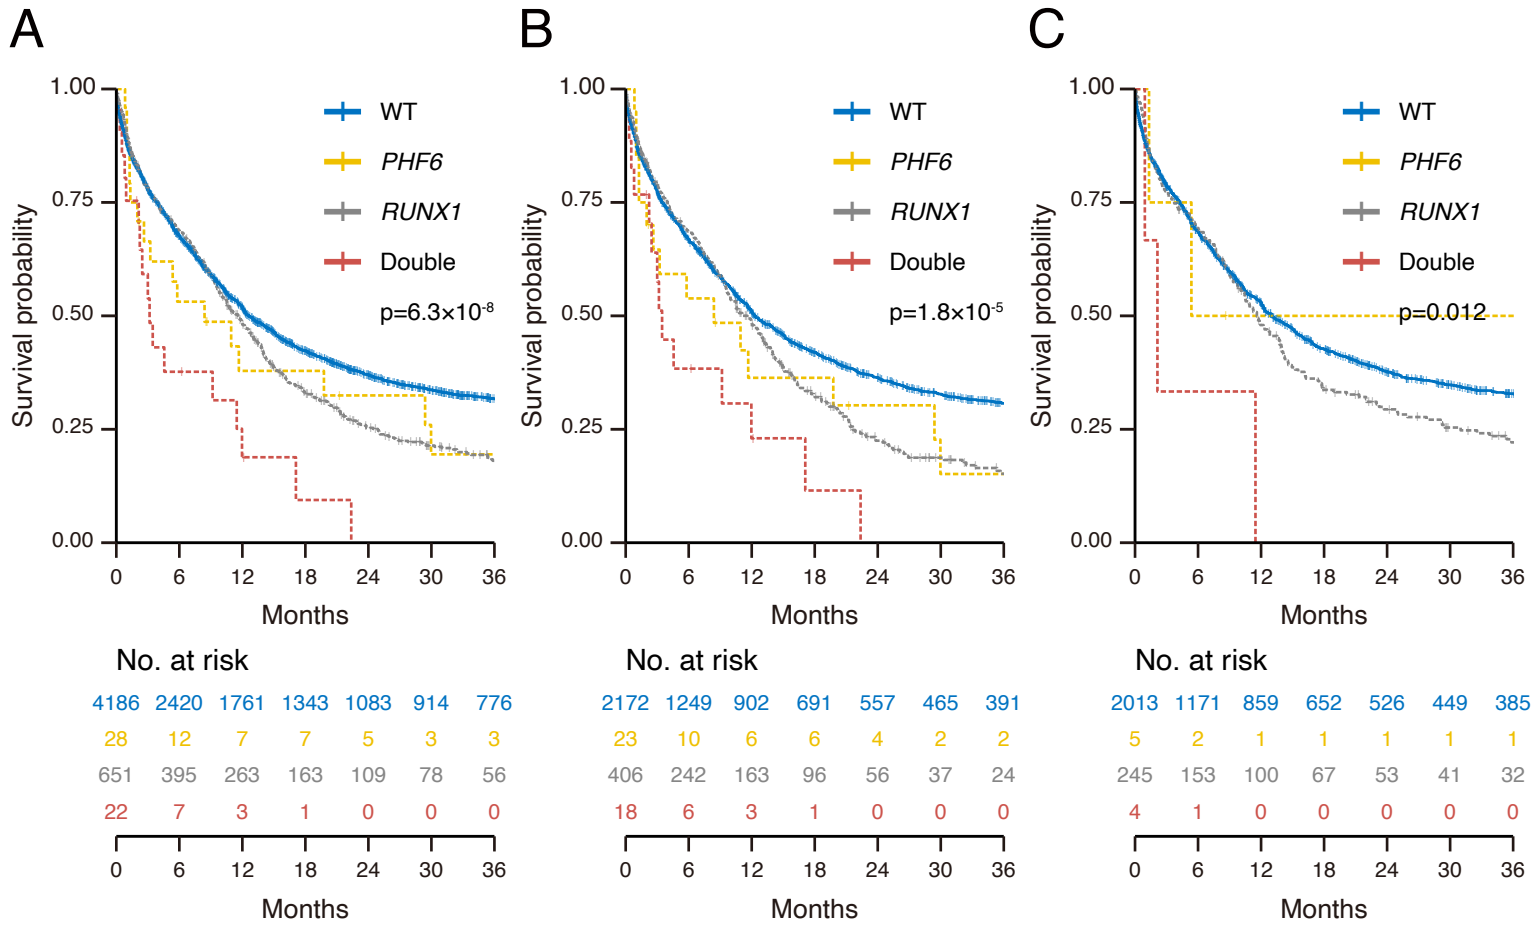

## Supplementary Figure 11

Event free survival for AML cases with double mutations (*PHF6* and *RUNX1*) in the CCF and MLL cohort. Kaplan-Meier survival curves of event free survival for female AML cases with double mutations (*PHF6* and *RUNX1*), single mutations, and negative cases in all (A), male (B), and female (C) cases. For survival analysis, survival was estimated using the Kaplan-Meier method and the log-rank test was used to assess differences between groups.

# Supplementary Figure 12

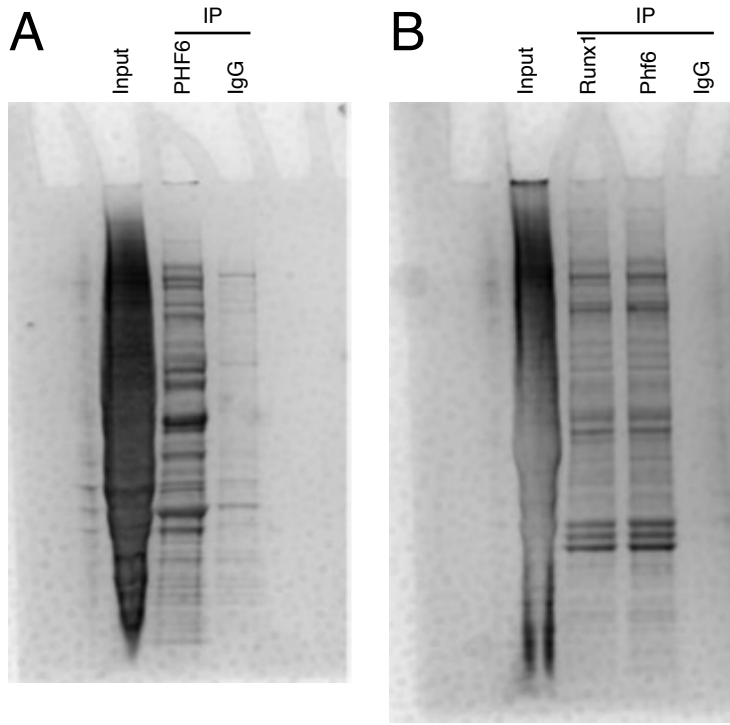

## Supplementary Figure 12

(A) 1D SDS-PAGE for IP-WB in Figure 6C. (B) 1D SDS-PAGE for IP-WB in Figure 6D. Proteins were visualized with Coomassie Blue staining. PHF6 / Phf6 and Runx1 IP clearly showed enrichments of selected proteins from the input.

# Supplementary Figure 13

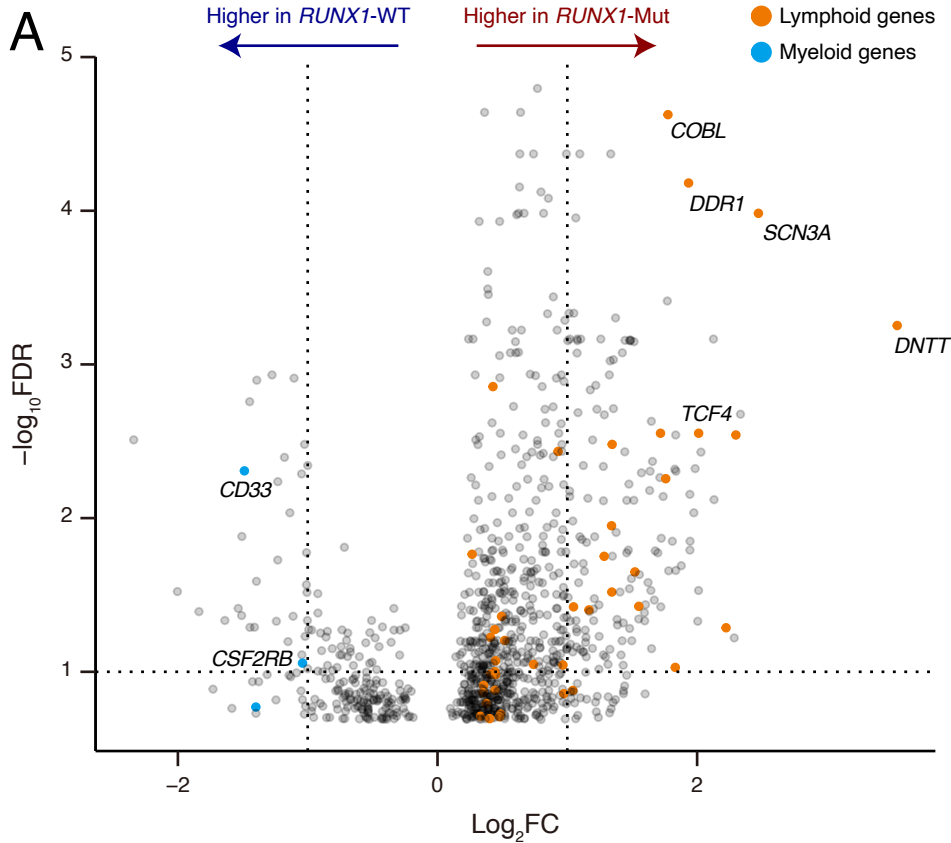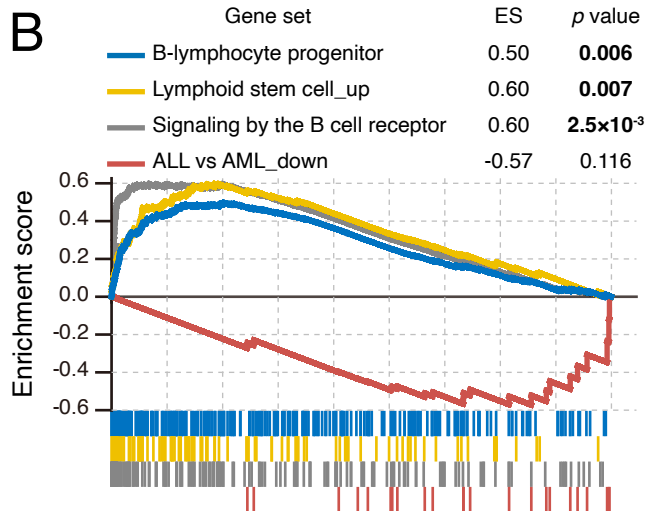

## Supplementary Figure 13

- (A) Volcano plot comparing significant expression difference between *RUNX1*-mutated (n=17) and wild-type (n=115) AML. Lymphoid and myeloid genes with differentially expression are colored in orange and blue, respectively. For differential expression gene analysis, we used the Bayesian method by the linear models for microarray expression data (limma) package version 3.50.0 in R software.
- (B) GSEA plot showing changes in lymphoid and myeloid signature genes between *RUNX1*-mutated and wild-type AML. To perform the enrichment of difference between *RUNX1*-mutated and wild-type AML, we used the Gene Set Enrichment (GSEA) software (v.4.3.2).



# Supplementary Figure 14

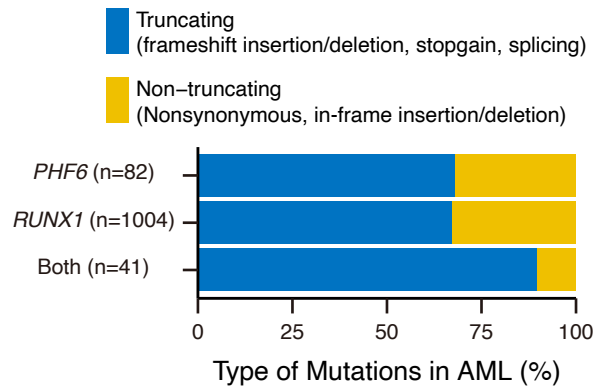

## Supplementary Figure 14

The fraction of truncating and non-truncating mutations in *PHF6*-mutated, *RUNX1*-mutated, and both-mutated samples. Samples with mutations in both genes have at least one truncating mutation in either *PHF6* or *RUNX1*.

# Supplementary Figure 15

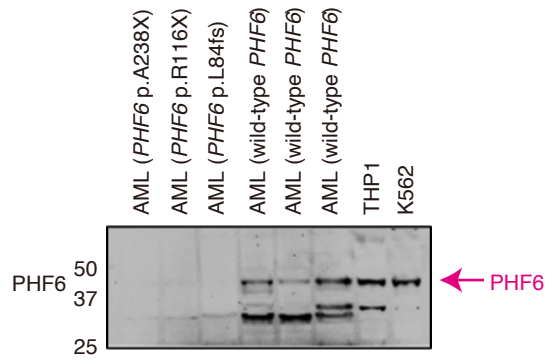

## Supplementary Figure 15

Western blots of PHF6 IP of nuclear protein extracts in AML samples with PHF6 mutations or wild-types. PHF6 bands are indicated by arrow in red color. The Western blot was done once in THP-1 and K562 cells.

# Supplementary Figure 16

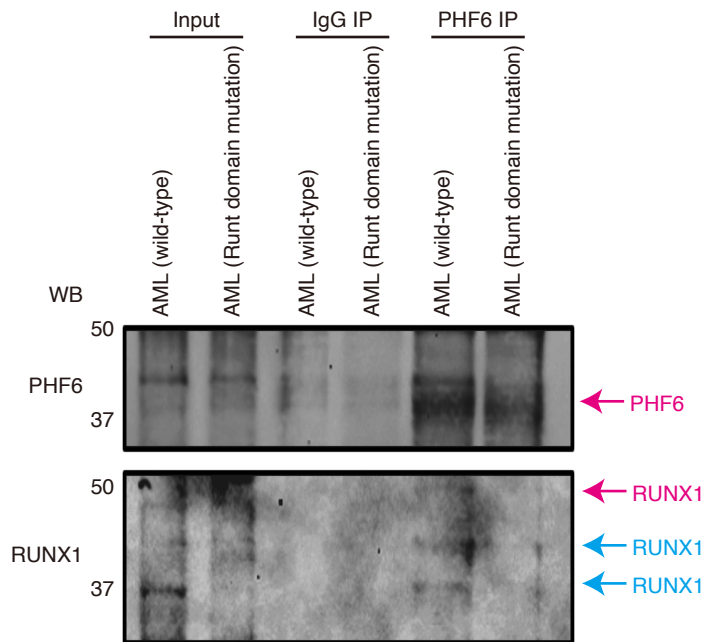

## Supplementary Figure 16

Western blots of endogenous PHF6 IP of nuclear protein extracts in AML samples with wild-type *RUNX1* or Runt domain mutations. 5% input, IgG control IP, and PHF6 IP product were run side by side. The same membrane was probed with an anti-rabbit monoclonal antibody to PHF6 and an antimouse monoclonal antibody to RUNX1. PHF6 and RUNX1 bands are indicated by arrows in red color. The other RUNX1 isoforms bands are indicated by arrows in blue color. The Western blot was done once in these AML cells.

# Supplementary Figure 17

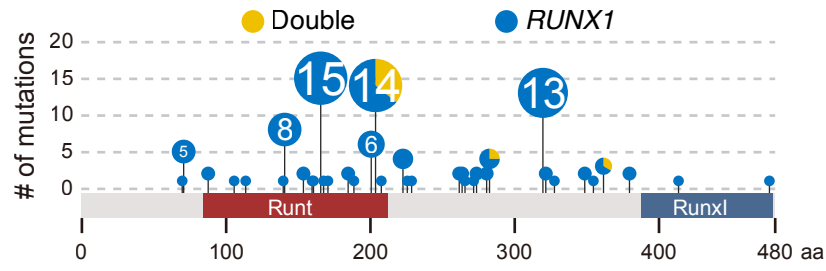

## Supplementary Figure 17

Lollipop plot showing *RUNX1* stopgain mutations in male AML samples with double (*RUNX1* and *PHF6*) mutations, or only *RUNX1* mutations. Mutational groups are shown by colors as indicated. The numbers in circles indicate the number of cases.

# Supplementary Figure 18

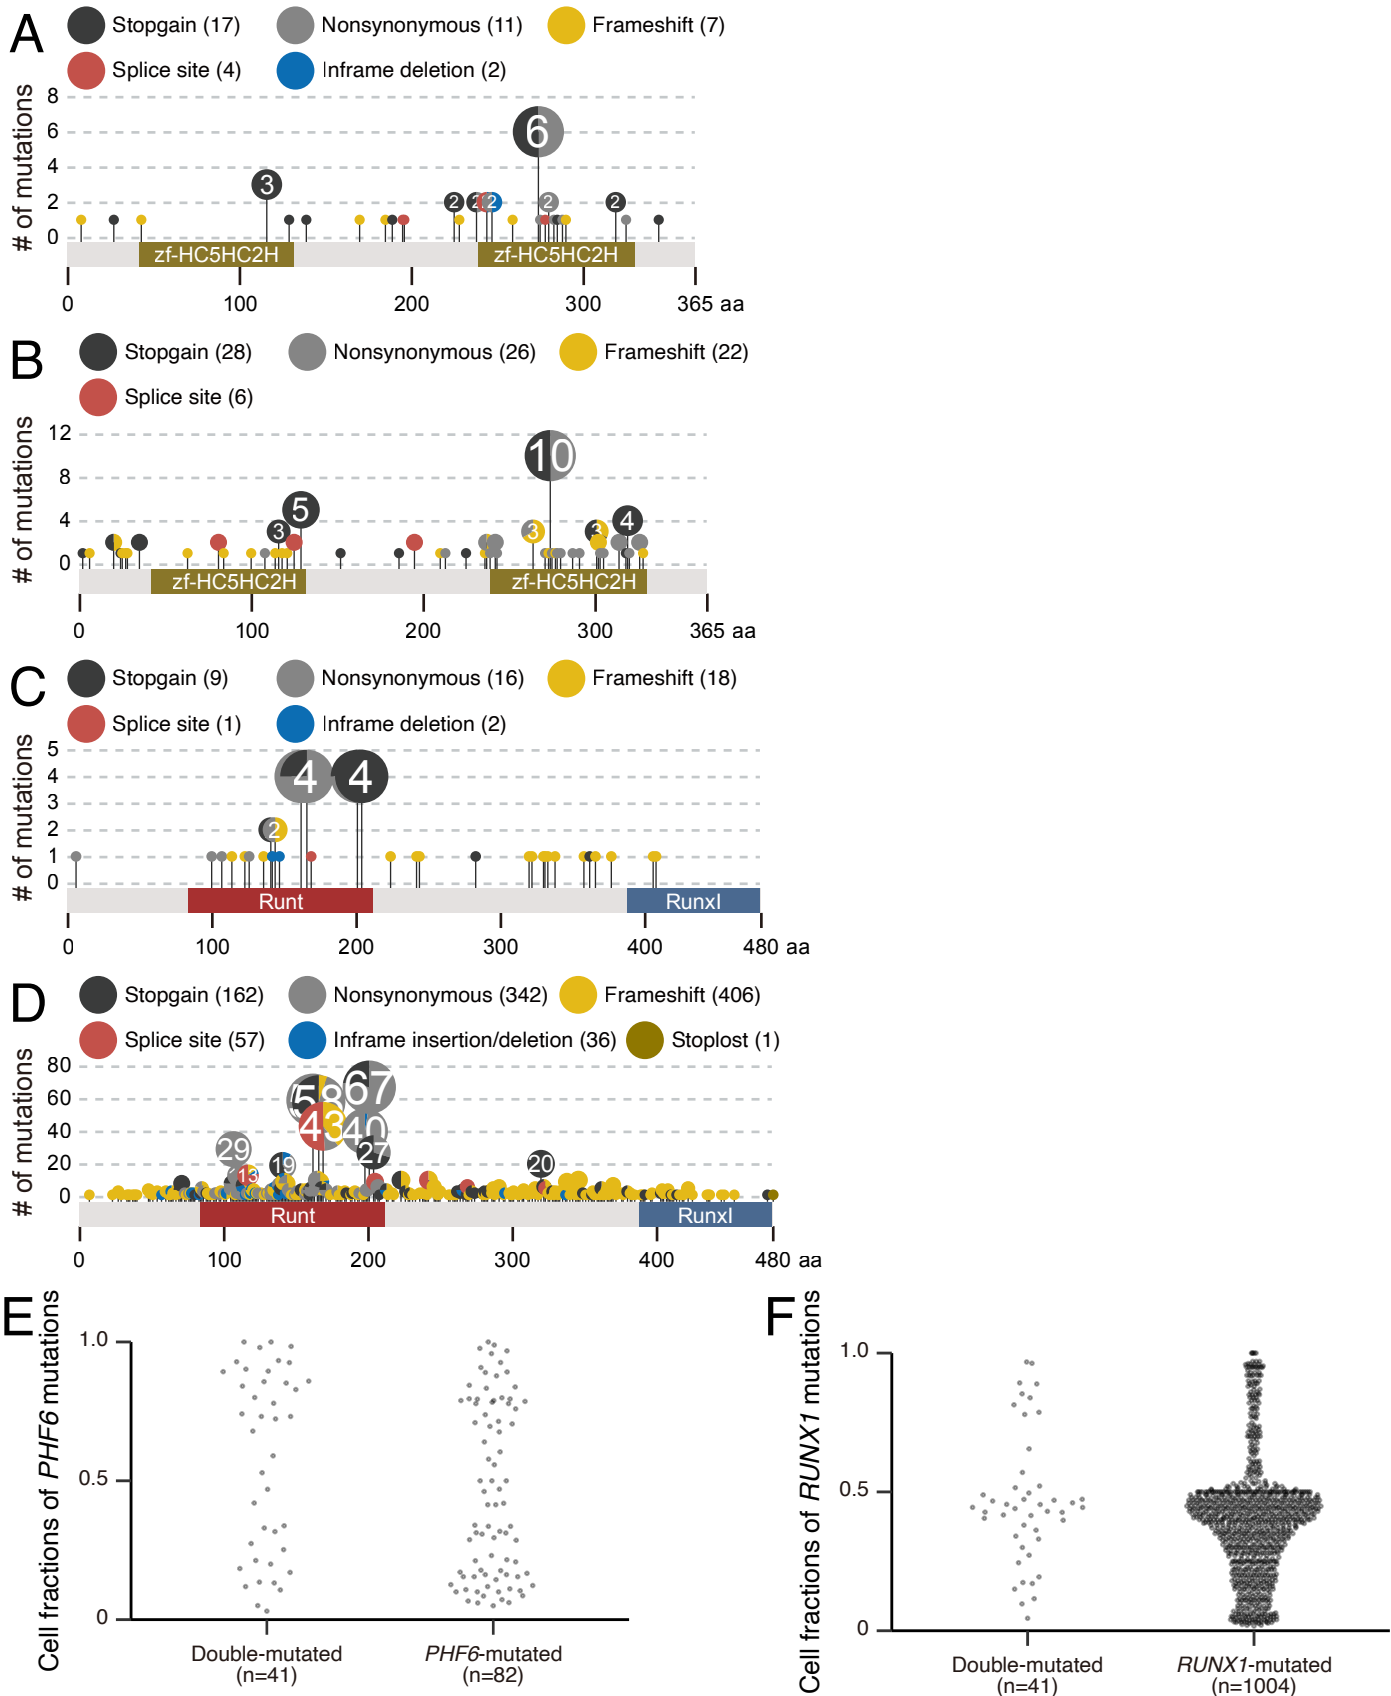

## Supplementary Figure 18

Lollipop plot of *PHF6* mutations in case with *PHF6* and *RUNX1* mutations (A) and only *PHF6* mutations (B). Lollipop plot of *RUNX1* mutations in cases with *PHF6* and *RUNX1* mutations (C) and only *RUNX1* mutations (D). The cell fraction with mutated *PHF6* or *RUNX1* allele in cases with *PHF6* and *RUNX1* mutations (E) and *PHF6* or *RUNX1* mutations (F).

Supplementary Table 1: Test statistics for mutations in genes on X chromosome

| Gene          | Odds ratio | 95% CI       | <i>p</i> value        | FDR                   |
|---------------|------------|--------------|-----------------------|-----------------------|
| <i>PHF6</i>   | 3.02       | 1.93 - 4.72  | $2.43 \times 10^{-7}$ | $2.19 \times 10^{-6}$ |
| <i>UBA1*</i>  | 14.0       | 1.20 - 163   | $3.29 \times 10^{-2}$ | $7.40 \times 10^{-2}$ |
| <i>ZRSR2</i>  | 4.31       | 2.18 - 8.52  | $2.70 \times 10^{-6}$ | $1.22 \times 10^{-5}$ |
| <i>STAG2</i>  | 1.79       | 1.32 - 2.43  | $1.57 \times 10^{-4}$ | $4.71 \times 10^{-4}$ |
| <i>BCORL1</i> | 1.76       | 0.537 - 5.76 | 0.409                 | 0.525                 |
| <i>BCOR</i>   | 1.29       | 0.957 - 1.74 | 0.100                 | 0.180                 |
| <i>ATRX</i>   | 1.13       | 0.252 - 5.07 | 1                     | 1                     |
| <i>PIGA</i>   | 1.04       | 0.834 - 1.30 | 0.780                 | 0.877                 |
| <i>KDM6A</i>  | 0.592      | 0.292 - 1.20 | 0.157                 | 0.236                 |

\*To avoid dividing zero, pseudo count of 1 is added to each cell in 2x2 table.

Supplementary Table 2: Upregulated pathways in *PHF6*-mutated AML

| Pathway                                                                                  | Size | NES        | NOM p-val | FDR q-val    | FWER p-val | Rank at max | Leading edge                        |
|------------------------------------------------------------------------------------------|------|------------|-----------|--------------|------------|-------------|-------------------------------------|
| VALK_AML_CLUSTER_1                                                                       | 29   | 0.67682016 | 2.0028014 | 0            | 1          | 0.495       | 2216 tags=55%, list=12%, signal=63% |
| BOGNI_TREATMENT_RELATED_MYELOID_LEUKEMIA_DN                                              | 33   | 0.5629568  | 1.8665005 | 0.012048192  | 1          | 0.815       | 5363 tags=64%, list=30%, signal=90% |
| REACTOME_RUNX2_REGULATES_BONE_DEVELOPMENT                                                | 29   | 0.5176277  | 1.8553703 | 0.0072202166 | 1          | 0.834       | 1623 tags=41%, list=9%, signal=45%  |
| HADDAD_B_LYMPHOCYTE_PROGENITOR                                                           | 274  | 0.46060374 | 1.8315852 | 0.014836796  | 1          | 0.866       | 4305 tags=45%, list=24%, signal=58% |
| CORONEL_RFX7_DIRECT_TARGETS_UP                                                           | 43   | 0.4852861  | 1.8039889 | 0.0027027028 | 1          | 0.902       | 2722 tags=40%, list=15%, signal=46% |
| WP_HEMATOPOIETIC_STEM_CELL_GENE_REGULATION_BY_GABP_ALPHABETA_COMPLEX                     | 21   | 0.60628396 | 1.7770096 | 0.014150944  | 1          | 0.923       | 3229 tags=52%, list=18%, signal=64% |
| FARMER_BREAST_CANCER_CLUSTER_5                                                           | 19   | 0.6610508  | 1.7377043 | 0.016032064  | 1          | 0.958       | 3559 tags=47%, list=20%, signal=59% |
| KEGG_BASAL_TRANSCRIPTION_FACTORS                                                         | 32   | 0.53525555 | 1.7120938 | 0.020703934  | 1          | 0.97        | 2322 tags=38%, list=13%, signal=43% |
| DAZARD_UV_RESPONSE_CLUSTER_G6                                                            | 142  | 0.4376627  | 1.7111005 | 0.027842227  | 1          | 0.97        | 4775 tags=49%, list=27%, signal=66% |
| DAZARD_RESPONSE_TO_UV_NHEK_DN                                                            | 294  | 0.41728464 | 1.655613  | 0.03211009   | 1          | 0.988       | 4695 tags=48%, list=26%, signal=64% |
| BIOCARTA_RAC1_PATHWAY                                                                    | 20   | 0.496195   | 1.6541853 | 0.021686748  | 1          | 0.99        | 1795 tags=35%, list=10%, signal=39% |
| YAO_TEMPORAL_RESPONSE_TO_PROGESTERONE_CLUSTER_2                                          | 45   | 0.42334962 | 1.652738  | 0.016216217  | 1          | 0.99        | 2908 tags=38%, list=16%, signal=45% |
| MEISSNER_NPC_ICP_WITH_H3K4ME3                                                            | 19   | 0.5282084  | 1.6264662 | 0.016528925  | 1          | 0.991       | 3779 tags=53%, list=21%, signal=67% |
| REACTOME_RUNX2_REGULATES_OSTEOBLAST_DIFFERENTIATION                                      | 23   | 0.47860286 | 1.6218047 | 0.026936026  | 1          | 0.993       | 1623 tags=39%, list=9%, signal=43%  |
| YUAN_ZNF143_PARTNERS                                                                     | 21   | 0.58038586 | 1.6008521 | 0.04863813   | 1          | 0.995       | 5322 tags=52%, list=30%, signal=74% |
| STAMBOLSKY_TARGETS_OF_MUTATED_TP53_UP                                                    | 42   | 0.39657044 | 1.5962424 | 0.012594459  | 1          | 0.995       | 3159 tags=38%, list=18%, signal=46% |
| REACTOME_CONSTITUTIVE_SIGNALING_BY_EGFRVIII                                              | 15   | 0.5440623  | 1.585723  | 0.045212764  | 1          | 0.995       | 1143 tags=33%, list=6%, signal=36%  |
| LINDGREN_BLADDER_CANCER_CLUSTER_1_UP                                                     | 116  | 0.3728909  | 1.5791982 | 0.014251782  | 1          | 0.996       | 4023 tags=40%, list=22%, signal=51% |
| BIOCARTA_CTCF_PATHWAY                                                                    | 24   | 0.50041837 | 1.5755477 | 0.046753246  | 1          | 0.997       | 4076 tags=58%, list=23%, signal=75% |
| BYSTROEM_CORRELATED_WITH_IL5_DN                                                          | 60   | 0.44670147 | 1.5701308 | 0.033783782  | 1          | 0.997       | 3699 tags=45%, list=21%, signal=56% |
| OSMAN_BLADDER_CANCER_DN                                                                  | 420  | 0.37290838 | 1.5638547 | 0.03908046   | 1          | 0.997       | 5067 tags=46%, list=28%, signal=62% |
| FIGUEROA_AML_METHYLATION_CLUSTER_2_UP                                                    | 46   | 0.40709114 | 1.5517147 | 0.031073445  | 1          | 0.997       | 3579 tags=39%, list=20%, signal=49% |
| PID_SMAD2_3NUCLEAR_PATHWAY                                                               | 76   | 0.37118644 | 1.5437632 | 0.025568182  | 1          | 0.997       | 5020 tags=46%, list=28%, signal=64% |
| PID_IL2_PI3K_PATHWAY                                                                     | 33   | 0.4148004  | 1.532098  | 0.044619422  | 1          | 0.998       | 4076 tags=42%, list=23%, signal=55% |
| GENTILE_UV_LOW_DOSE_UP                                                                   | 25   | 0.46566504 | 1.5169954 | 0.048231512  | 1          | 0.999       | 4218 tags=44%, list=23%, signal=57% |
| GAL_LEUKEMIC_STEM_CELL_UP                                                                | 117  | 0.34872118 | 1.5157202 | 0.015337423  | 1          | 0.999       | 3617 tags=33%, list=20%, signal=41% |
| PID_AR_TF_PATHWAY                                                                        | 46   | 0.40596524 | 1.5073072 | 0.045783132  | 1          | 0.999       | 2561 tags=33%, list=14%, signal=38% |
| BILD_CTNNB1_ONCOGENIC_SIGNATURE                                                          | 74   | 0.3902668  | 1.4852865 | 0.031400967  | 1          | 0.999       | 3438 tags=35%, list=19%, signal=43% |
| REACTOME_NR1H3_NR1H2_REGULATE_GENE_EXPRESSION_LINKED_TO_CHOLESTEROL_TRANSPORT_AND_EFFLUX | 33   | 0.43678012 | 1.4816378 | 0.04477612   | 1          | 0.999       | 4339 tags=42%, list=24%, signal=56% |
| BROWNE_HCMV_INFECTION_6HR_DN                                                             | 157  | 0.3272081  | 1.4804101 | 0.04731861   | 1          | 0.999       | 4396 tags=42%, list=24%, signal=55% |
| LEE_AGING_NEOCORTEX_DN                                                                   | 51   | 0.34871122 | 1.4739994 | 0.022653721  | 1          | 0.999       | 2178 tags=27%, list=12%, signal=31% |
| MARTORIATI_MDM4_TARGETS_FETAL_LIVER_DN                                                   | 479  | 0.31409332 | 1.4693968 | 0.043062203  | 1          | 0.999       | 4417 tags=37%, list=25%, signal=47% |
| HOWLIN_CITED1_TARGETS_1_UP                                                               | 33   | 0.3844786  | 1.459304  | 0.04373178   | 1          | 0.999       | 2861 tags=27%, list=16%, signal=32% |
| SHIPP_DLBCL_CURED_VS_FATAL_UP                                                            | 29   | 0.38754874 | 1.448318  | 0.04661017   | 1          | 0.999       | 2415 tags=31%, list=13%, signal=36% |
| KONDO_EZH2_TARGETS                                                                       | 192  | 0.26440793 | 1.3345587 | 0.04477612   | 1          | 1           | 3033 tags=26%, list=17%, signal=30% |

Supplementary Table 3: Downregulated pathways in *RUNX1*-mutated AML

| Pathway                                                                        | Size | ES          | NES        | NOM p-val    | FDR q-val | FWER p-val | Rank at max | Leading edge                         |
|--------------------------------------------------------------------------------|------|-------------|------------|--------------|-----------|------------|-------------|--------------------------------------|
| BIOCARTA_MITOCHONDRIA_PATHWAY                                                  | 19   | -0.7161914  | -2.039181  |              | 0         | 0.25681373 | 0.173       | 1719 tags=53%, list=10%, signal=58%  |
| REACTOME_GLYCOSPHINGOLIPID_METABOLISM                                          | 39   | -0.60526234 | -1.8162571 | 0.0033955858 |           | 1          | 0.872       | 743 tags=31%, list=4%, signal=32%    |
| WP_NANOMATERIAL_INDUCED_APOPTOSIS                                              | 20   | -0.6128473  | -1.7895322 | 0.0055555557 |           | 1          | 0.916       | 2946 tags=45%, list=16%, signal=54%  |
| WAGNER_APO2_SENSITIVITY                                                        | 18   | -0.6235822  | -1.7509547 | 0.008695652  |           | 1          | 0.965       | 1263 tags=33%, list=7%, signal=36%   |
| WP_APOPTOSIS_MODULATION_BY_HSP70                                               | 19   | -0.6269025  | -1.7266896 | 0.013257576  |           | 1          | 0.981       | 2946 tags=47%, list=16%, signal=57%  |
| KEGG_GLYCOSAMINOGLYCAN_DEGRADATION                                             | 18   | -0.6867038  | -1.6856623 | 0.010638298  |           | 1          | 0.994       | 2984 tags=56%, list=17%, signal=67%  |
| WP_GLYCOSAMINOGLYCAN_DEGRADATION                                               | 15   | -0.69961977 | -1.6617068 | 0.03068592   |           | 1          | 0.997       | 2984 tags=60%, list=17%, signal=72%  |
| ROYLANCE_BREAST_CANCER_16Q_COPY_NUMBER_DN                                      | 19   | -0.5919067  | -1.6546073 | 0.029513888  |           | 1          | 0.997       | 1730 tags=53%, list=10%, signal=58%  |
| WP_METHIONINE_DE_NOVO_AND_SALVAGE_PATHWAY                                      | 19   | -0.597519   | -1.6521629 | 0.021032505  |           | 1          | 0.997       | 3757 tags=58%, list=21%, signal=73%  |
| KEGG_OTHER_GLYCAN_DEGRADATION                                                  | 15   | -0.6779646  | -1.6257278 | 0.04708098   |           | 1          | 0.999       | 1282 tags=53%, list=7%, signal=57%   |
| WANG_CLASSIC_ADIPOGENIC_TARGETS_OF_PPARG                                       | 24   | -0.5626743  | -1.5848125 | 0.016313214  |           | 1          | 1           | 5374 tags=71%, list=30%, signal=101% |
| REACTOME_HYALURONAN_METABOLISM                                                 | 16   | -0.6030546  | -1.5688671 | 0.049099836  |           | 1          | 1           | 323 tags=31%, list=2%, signal=32%    |
| REACTOME_BBSOME_MEDIATED_CARGO_TARGETING_TO_CILIUM                             | 23   | -0.5820366  | -1.5460275 | 0.04518664   |           | 1          | 1           | 5741 tags=65%, list=32%, signal=96%  |
| REACTOME_BLOOD_GROUP_SYSTEMS_BIOSYNTHESIS                                      | 17   | -0.5470982  | -1.5379107 | 0.024853801  |           | 1          | 1           | 1263 tags=29%, list=7%, signal=32%   |
| ZHAN_MULTIPLE_MYELOMA_CD1_AND_CD2_DN                                           | 54   | -0.3959537  | -1.5377092 | 0.02247191   |           | 1          | 1           | 3365 tags=39%, list=19%, signal=48%  |
| MOREIRA_RESPONSE_TO_TSA_UP                                                     | 28   | -0.47837305 | -1.5352522 | 0.039049234  |           | 1          | 1           | 5186 tags=54%, list=29%, signal=75%  |
| BILANGES_SERUM_SENSITIVE_VIA_TSC1                                              | 15   | -0.5335756  | -1.5202199 | 0.036363635  |           | 1          | 1           | 2823 tags=53%, list=16%, signal=63%  |
| KEGG_AMYOTROPHIC_LATERAL_SCLEROSIS_ALS                                         | 41   | -0.44808972 | -1.5107236 | 0.036585364  |           | 1          | 1           | 3095 tags=37%, list=17%, signal=44%  |
| BOYALT_LIVER_CANCER_SUBCLASS_G123_DN                                           | 42   | -0.440007   | -1.5103427 | 0.030165913  |           | 1          | 1           | 3353 tags=38%, list=19%, signal=47%  |
| REACTOME KERATAN SULFATE KERATIN METABOLISM                                    | 27   | -0.47758374 | -1.5037926 | 0.028753994  |           | 1          | 1           | 2984 tags=41%, list=17%, signal=49%  |
| RUAN_RESPONSE_TO_TROGLITAZONE_UP                                               | 20   | -0.49625146 | -1.4982431 | 0.036624204  |           | 1          | 1           | 2270 tags=40%, list=13%, signal=46%  |
| YEGNASUBRAMANIAN_PROSTATE_CANCER                                               | 93   | -0.40100428 | -1.4921252 | 0.04858934   |           | 1          | 1           | 3293 tags=32%, list=18%, signal=39%  |
| WP_SARSCOV2_MITOCHONDRIAL_CHRONIC_OXIDATIVE_STRESS_AND_ENDOTHELIAL_DYSFUNCTION | 25   | -0.46568382 | -1.4850926 | 0.04553734   |           | 1          | 1           | 5151 tags=64%, list=29%, signal=90%  |
| REACTOME_PHASE_I_FUNCTIONALIZATION_OF_COMPOUNDS                                | 65   | -0.4158694  | -1.4746938 | 0.030259365  |           | 1          | 1           | 3674 tags=40%, list=20%, signal=50%  |
| WP_PARKINSONS_DISEASE_PATHWAY                                                  | 35   | -0.42404723 | -1.4475983 | 0.042955328  |           | 1          | 1           | 2935 tags=37%, list=16%, signal=44%  |
| ROSS_AML_WITH_PML_RARA_FUSION                                                  | 79   | -0.58043605 | -1.4379978 | 0.044262294  |           | 1          | 1           | 3229 tags=48%, list=18%, signal=58%  |
| REACTOME_BIOLOGICAL_OXIDATIONS                                                 | 139  | -0.3832166  | -1.4340707 | 0.0474732    |           | 1          | 1           | 3757 tags=37%, list=21%, signal=47%  |



Supplementary Table 4: FCM result in patients' with *PHF6* mutation

| Cohort ID | Age Group | Sex | Dx  | Subtype | Karyotype | cDNA                  | AA      | VAF    | TdT | GCSAM     | LY9 |
|-----------|-----------|-----|-----|---------|-----------|-----------------------|---------|--------|-----|-----------|-----|
| PHF6_0057 | 70-80     | M   | AML | sAML    | Trisomy 8 | c.953C>G              | p.S318X | 0.89   | Neg | Pos (dim) | Pos |
| PHF6_0060 | 50-60     | M   | AML | pAML    | Other     | c.862G>A              | p.A288T | 1      | Pos | Neg       | Neg |
| PHF6_0370 | 70-80     | M   | AML | sAML    | Trisomy 8 | c.908A>G              | p.Y303C | 0.8333 | Pos | Neg       | Neg |
| PHF6_0692 | 60-70     | M   | AML | sAML    | Normal    | c.385C>T              | p.R129X | 0.9256 | Neg | Pos (dim) | Neg |
| PHF6_0992 | 50-60     | F   | AML | sAML    | DelX      | c.820C>T              | p.R274X | 1      | Neg | Neg       | Pos |
| PHF6_1085 | 60-70     | M   | AML | pAML    | Normal    | c.712_714delGCCinsTGA | p.A238X | 0.933  | Neg | Neg       | Neg |

Supplementary Table 5 The number of cases by each cohort

| Cohort                    | Diseases | Number of cases |
|---------------------------|----------|-----------------|
| CCF                       | All      | 1465            |
|                           | AML      | 1039            |
|                           | MDS      | 208             |
|                           | MDS/MPN  | 42              |
|                           | MPN      | 176             |
| MLL                       | All      | 5109            |
|                           | AML      | 4007            |
|                           | MDS      | 706             |
|                           | MDS/MPN  | 335             |
|                           | MPN      | 61              |
| BeatAML                   | All      | 618             |
|                           | AML      | 589             |
|                           | MDS      | 17              |
|                           | MDS/MPN  | 9               |
|                           | MPN      | 3               |
| German–Austrian AML Study | AML      | 1251            |

Supplementary Table 6 Targeted panel genes

| Gene          | Transcript     | Exon            |
|---------------|----------------|-----------------|
| <i>ABL1</i>   | NM_005157.5    | 4-6             |
| <i>ASXL1</i>  | NM_15338.5     | 10-13           |
| <i>BCOR</i>   | NM_17745.5     | 2-15            |
| <i>BCORL1</i> | NM_021946.4    | 1-12            |
| <i>BRAF</i>   | NM_004333.4    | 15              |
| <i>CALR</i>   | NM_004343.3    | 9               |
| <i>CBL</i>    | NM_005188.3    | 8-9             |
| <i>CDKN2A</i> | NM_000077.4    | 1-2             |
| <i>CDKN2A</i> | NM_058195.3    | 1               |
| <i>CEBPA</i>  | NM_004364.4    | 1               |
| <i>CSF3R</i>  | NM_000760.3    | 14-17           |
| <i>CUX1</i>   | NM_001202543.1 | 15-24           |
| <i>CUX1</i>   | NM_001913.4    | 1-23            |
| <i>DDX41</i>  | NM_016222.3    | 1-17            |
| <i>DNMT3A</i> | NM_022552.4    | 2-23            |
| <i>EED</i>    | NM_003797.4    | 1-12            |
| <i>ETNK1</i>  | NM_018638.4    | 3               |
| <i>ETV6</i>   | NM_001987.4    | 1-8             |
| <i>EZH2</i>   | NM_004456.4    | 2-20            |
| <i>FBXW7</i>  | NM_018315.4    | 7-11            |
| <i>FLT3</i>   | NM_004119.2    | 14-17, 19-20    |
| <i>GATA1</i>  | NM_002049.3    | 2, 4            |
| <i>GATA2</i>  | NM_032638.4    | 2-6             |
| <i>GNAS</i>   | NM_000516.5    | 8-11            |
| <i>IDH1</i>   | NM_005896.3    | 4               |
| <i>IDH2</i>   | NM_002168.3    | 4               |
| <i>IKZF1</i>  | NM_006060.5    | 2-3, 5-7        |
| <i>JAK2</i>   | NM_004972.3    | 12-16           |
| <i>JAK3</i>   | NM_000215.3    | 11-18           |
| <i>KDM6A</i>  | NM_021140.3    | 1-29            |
| <i>KIT</i>    | NM_000222.2    | 2, 8-11, 13, 17 |
| <i>KMT2A</i>  | NM_005933.3    | 1-36            |
| <i>KRAS</i>   | NM_004985.4    | 2-4             |
| <i>LUC7L2</i> | NM_001244585.1 | 2-11            |
| <i>MPL</i>    | NM_005373.2    | 10-11           |
| <i>MYD88</i>  | NM_002468.4    | 5               |
| <i>NF1</i>    | NM_000267.3    | 1-57            |
| <i>NF1</i>    | NM_001042492.2 | 31              |
| <i>NOTCH1</i> | NM_17617.4     | 26, 27, 34      |
| <i>NPM1</i>   | NM_002520.6    | 8-11            |
| <i>NRAS</i>   | NM_002524.4    | 2-4             |
| <i>PAX5</i>   | NM_016734.2    | 1-10            |
| <i>PHF6</i>   | NM_001015877.1 | 2-10            |
| <i>PIGA</i>   | NM_002641.3    | 2-6             |
| <i>PPM1D</i>  | NM_003620.3    | 1-6             |
| <i>PRPF8</i>  | NM_006445.3    | 2-43            |
| <i>PTEN</i>   | NM_000314.6    | 1-9             |
| <i>PTPN11</i> | NM_002834.3    | 3-4, 12-13      |
| <i>RAD21</i>  | NM_006265.2    | 2-14            |
| <i>RIT1</i>   | NM_006912.5    | 5               |
| <i>RUNX1</i>  | NM_001754.4    | 2-9             |
| <i>RUNX1</i>  | NM_001122607.1 | 5               |
| <i>SETBP1</i> | NM_015559.2    | 4               |
| <i>SF3B1</i>  | NM_012433.3    | 13-16           |
| <i>SH2B3</i>  | NM_005475.2    | 2               |
| <i>SMC1A</i>  | NM_006306.3    | 1-25            |
| <i>SMC3</i>   | NM_005445.3    | 1-29            |
| <i>SRSF2</i>  | NM_003016.4    | 1-2             |
| <i>STAG2</i>  | NM_00104279.2  | 3-35            |
| <i>STAT3</i>  | NM_003150.3    | 20-21           |
| <i>STAT5B</i> | NM_012448.3    | 16-18           |
| <i>SUZ12</i>  | NM_015355.3    | 1-16            |
| <i>TET2</i>   | NM_001127208.2 | 3-11            |
| <i>TP53</i>   | NM_000546.5    | 2-11            |
| <i>U2AF1</i>  | NM_006758.2    | 2, 6            |
| <i>WT1</i>    | NM_000378.4    | 1-9             |
| <i>ZRSR2</i>  | NM_005089.3    | 1-11            |
